# Supplementary material
Source: PubMed Central journal article supplement (PMC3194959)
Supplement: supp_85_21_11196__1.pdf [file supp_85_21_11196__1.pdf]

# Figure S1

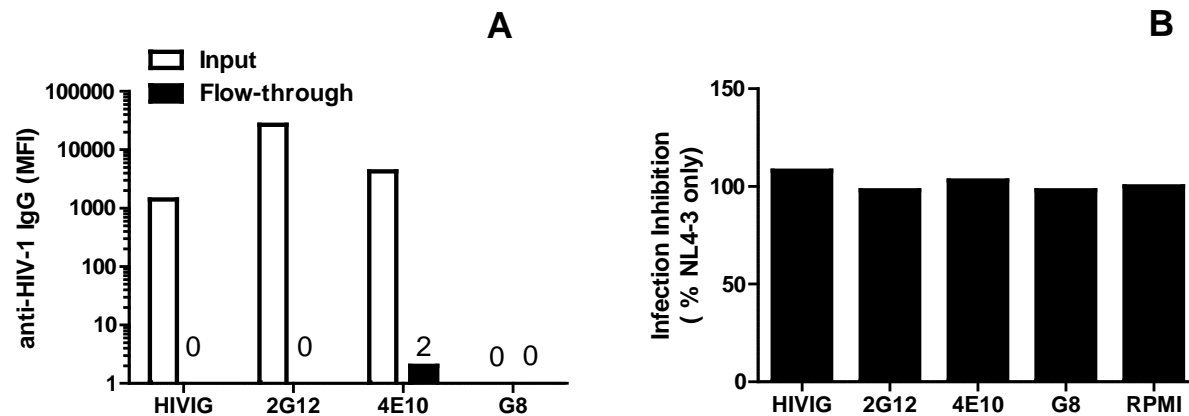

**Figure S1. Controls for removal of HIV-1 specific IgG by Protein G column.** 150 $\mu$ l of 10  $\mu$ g/ml IgG or RPMI was absorbed by Protein G as the experiments in Figure 4. **A.** No detectable HIV-1 specific IgG in the flow-through after Protein G absorption. HIV-1 specific IgG in the flow-through fraction was measured by a HIV-1 multiplex binding assay (HIVIG, 2G12, and G8 against ConSgp140, 4E10 against HIV-1 Env gp41) after passing through the Protein G column. **B.** The flow-through of the 2G12 mAb after absorption by Protein G columns did not inhibit virus replication in a TZM-bl neutralization assay.

**Figure S2**

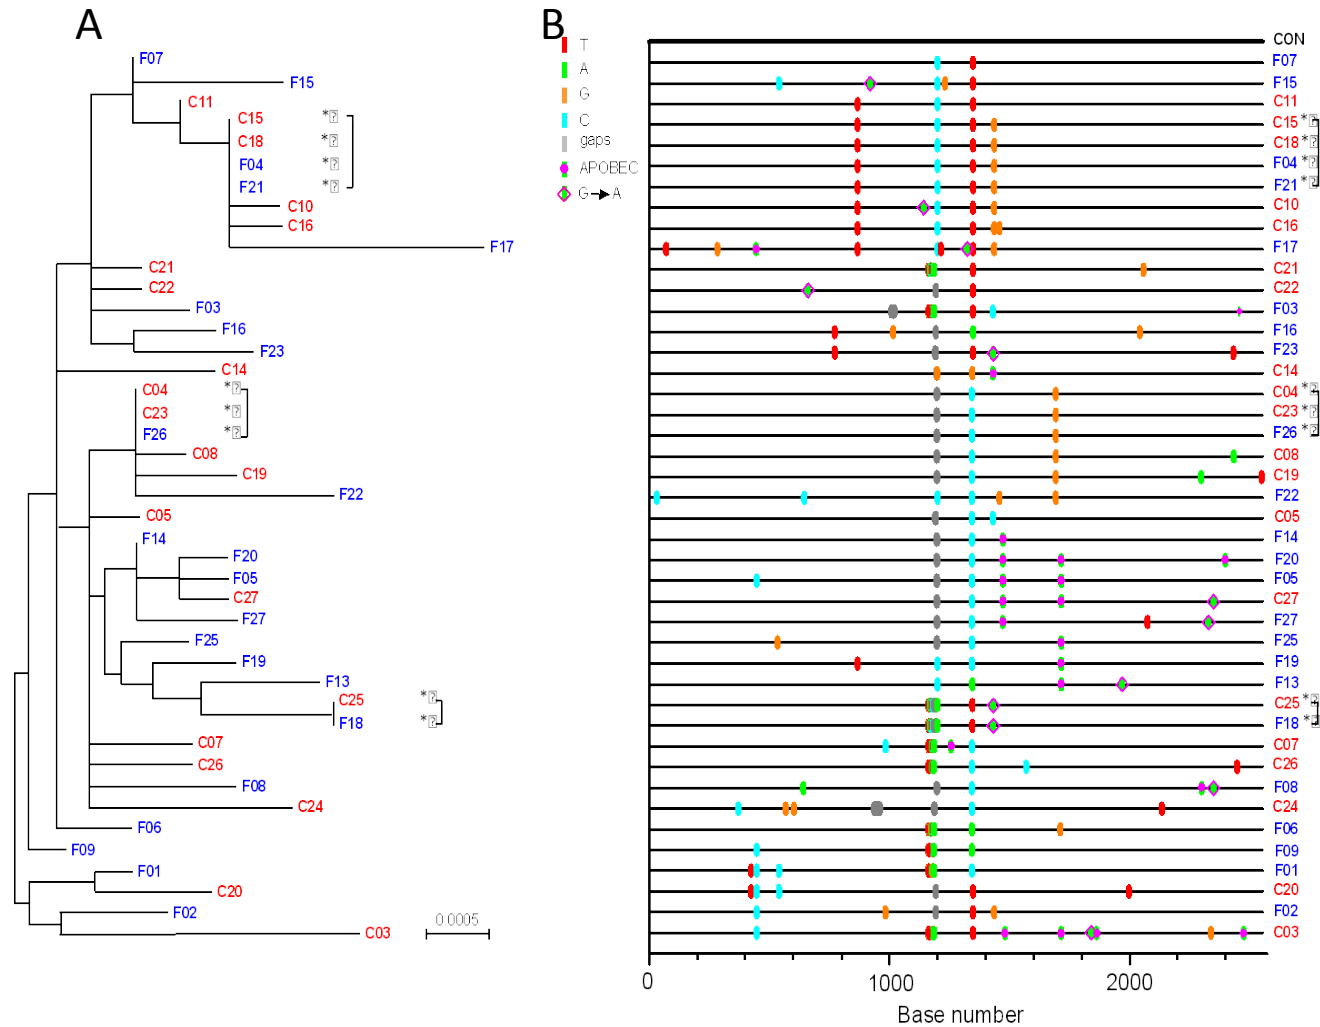

**Figure S2. Analysis of complete *env* sequences from captured and uncaptured (flow-through) virions.** The *env* sequences were obtained by SGA and analyzed using **A.** the Neighbor-Joining tree and **B.** Highlighter plot methods. The sequences from captured viruses are indicated by red color and those from flow-through viruses by blue color. Sequences identical to each other in each phylogenetic lineage are indicated by asterisks. The horizontal scale represents genetic distance.

# Figure S3

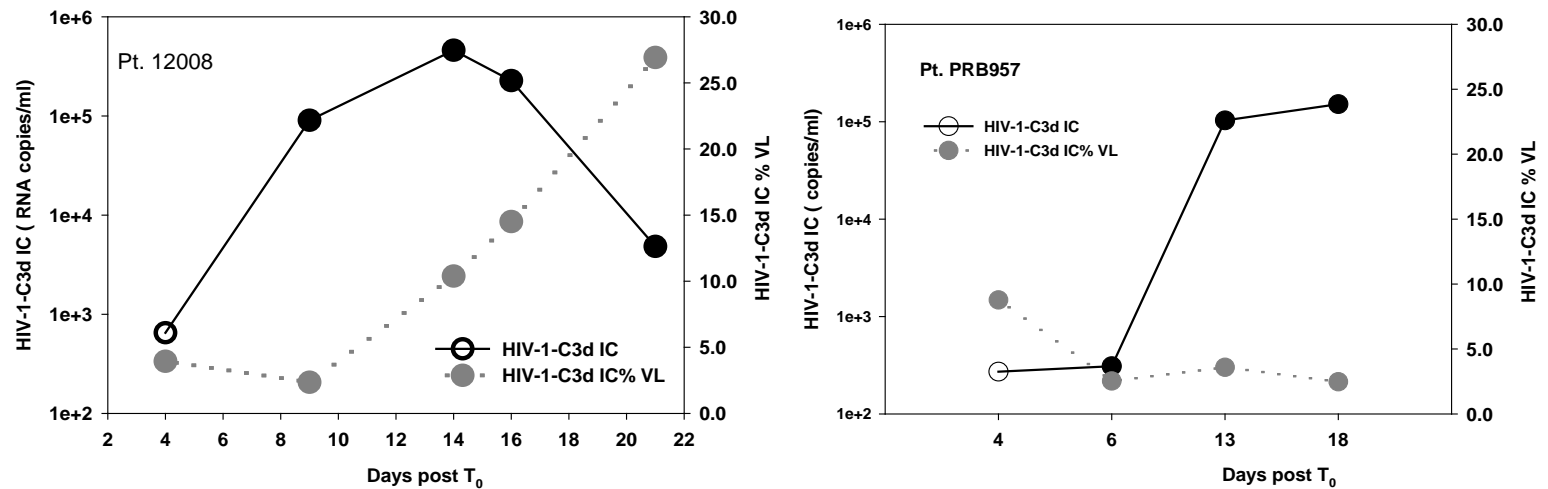

**Figure S3. HIV-1-C3d IC were detectable in plasma from AHI.** HIV-1-C3d IC in plasma were captured by mouse anti-C3d IgG coated microplate as described in (43). The captured C3d-virion IC were lysed and measured by viral RNA real time RT-PCR. The HIV-1 –C3d IC was presented as viral RNA copies/ml (Black circle). The percentage of the HIV-1-C3d IC to the total plasma viral load was calculated and shown here (gray circle). The results of 2 typical subjects were shown here.

Figure S4

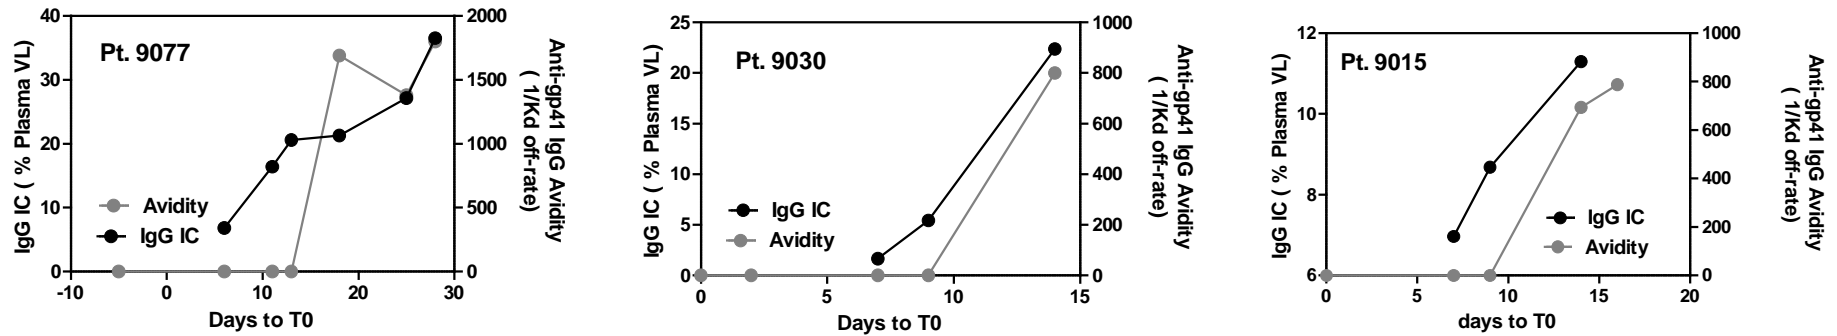

Figure S4. The endogenous IgG-virion IC plotted vs. the dissociation rates for anti-gp41 IgG in 3 additional AH1 subjects.

Table S1

| Cohort                              | Subjects ID | Captured Virions (RNA)<br>(copies/ml) | Total Virions (RNA)*<br>(copies/ml) | Peak of Endogenous IgG-<br>virion IC<br>(%) |
|-------------------------------------|-------------|---------------------------------------|-------------------------------------|---------------------------------------------|
| Plasma Donor<br>ZeptoMetrix<br>N=13 | 9012        | 4554                                  | 11529                               | 39.5                                        |
|                                     | 9015        | 78000                                 | 690265                              | 11.3                                        |
|                                     | 9018        | 27775                                 | 143170                              | 19.4                                        |
|                                     | 9021        | 219250                                | 504023                              | 43.5                                        |
|                                     | 9023        | 36480                                 | 388085                              | 9.4                                         |
|                                     | 9030        | 123000                                | 549107                              | 22.4                                        |
|                                     | 9034        | 31660                                 | 245426                              | 12.9                                        |
|                                     | 9075        | 119800                                | 469804                              | 25.5                                        |
|                                     | 9076        | 1819                                  | 2584                                | 70.4                                        |
|                                     | 9077        | 3216                                  | 8787                                | 36.6                                        |
|                                     | 12008       | 3232                                  | 35130                               | 9.2                                         |
|                                     | 6244        | 4299                                  | 102357                              | 4.2                                         |
|                                     | 6247        | 342                                   | 8143                                | 4.2                                         |
| Plasma Donor<br>Seracare<br>N=4     | PRB939      | 687                                   | 1544                                | 44.5                                        |
|                                     | PRB943      | 2725                                  | 38380                               | 7.1                                         |
|                                     | PRB951      | 33275                                 | 350263                              | 9.5                                         |
|                                     | PRB957      | 168750                                | 1962209                             | 8.6                                         |
| Acute CHAVI<br>001<br>N=21          | C1-0275     | 6760                                  | 75111                               | 9.0                                         |
|                                     | C1-0427     | 1167                                  | 2785                                | 41.9                                        |
|                                     | C1-0570     | 0                                     | 7043                                | 0                                           |
|                                     | C1-0666     | 9360                                  | 95510                               | 9.8                                         |
|                                     | C1-0709     | 1212                                  | 7528                                | 16.1                                        |
|                                     | C1-0850     | 30040                                 | 236535                              | 12.7                                        |
|                                     | C1-0358     | 79800                                 | 128090                              | 62.3                                        |
|                                     | C1-0517     | 90800                                 | 132943                              | 68.3                                        |
|                                     | C1-0149     | 1856                                  | 4052                                | 45.8                                        |
|                                     | C1-0185     | 3868                                  | 17743                               | 21.8                                        |
|                                     | C1-0047     | 8700                                  | 20519                               | 42.4                                        |
|                                     | C1-0157     | 1112                                  | 5032                                | 22.1                                        |
|                                     | C1-0736     | 4632                                  | 11847                               | 39.1                                        |
|                                     | C1-0798     | 170400                                | 230582                              | 73.9                                        |
|                                     | C1-0455     | 55160                                 | 100109                              | 55.1                                        |
|                                     | C1-0976     | 9400                                  | 17871                               | 52.6                                        |
|                                     | C1-1023     | 8833                                  | 22138                               | 39.9                                        |
|                                     | C1-1096     | 37120                                 | 74240                               | 50.0                                        |
|                                     | C1-1215     | 19080                                 | 61154                               | 31.2                                        |
|                                     | C1-0731     | 5236                                  | 16061                               | 32.6                                        |
|                                     | C1-0010     | 32229                                 | 51649                               | 62.4                                        |
| Chronic CHAVI<br>001<br>N=10        | C1-0586     | 19600                                 | 29297                               | 66.9                                        |
|                                     | C1-0645     | 75720                                 | 128122                              | 59.1                                        |
|                                     | C1-0237     | 940                                   | 2892                                | 32.5                                        |
|                                     | C1-0060     | 407                                   | 651                                 | 62.5                                        |
|                                     | C1-0642     | 18520                                 | 26647                               | 69.5                                        |
|                                     | C1-0588     | 19060                                 | 41435                               | 46.0                                        |
|                                     | C1-0261     | 5526                                  | 8771                                | 63.0                                        |
|                                     | C1-0300     | 2904                                  | 6785                                | 42.8                                        |
|                                     | C1-0573     | 177                                   | 276                                 | 64.1                                        |
|                                     | C1-0598     | 2082                                  | 4090                                | 50.9                                        |

**Table S1. Summary of the peak of plasma endogenous IgG coated virion IC in 38 AHI and 10 chronic subjects.**

\*Total virions (RNA) = the viral RNA of the flow-through + the viral RNA of capture in Protein G capture assay

Table S2

| Patient | $f = 1$<br>$K$ (l/mol)                                         | $f = 14$<br>$K$ (l/mol)                                        | $f = 35$<br>$K$ (l/mol)                                        |
|---------|----------------------------------------------------------------|----------------------------------------------------------------|----------------------------------------------------------------|
| PRB951  | $7.9 \times 10^5$<br>[0, $5.8 \times 10^6$ ]                   | $5.4 \times 10^4$<br>[0, $3.2 \times 10^5$ ]                   | $2.2 \times 10^4$<br>[0, $1.2 \times 10^5$ ]                   |
| PRB957  | $6.2 \times 10^4$<br>[0, $4.6 \times 10^5$ ]                   | $4.3 \times 10^3$<br>[0, $2.5 \times 10^4$ ]                   | $1.7 \times 10^3$<br>[0, $9.8 \times 10^3$ ]                   |
| PRB939  | $4.2 \times 10^4$<br>[ $1.9 \times 10^4$ , $8.4 \times 10^4$ ] | $2.2 \times 10^3$<br>[ $1.1 \times 10^3$ , $3.7 \times 10^3$ ] | $8.8 \times 10^2$<br>[ $4.7 \times 10^2$ , $1.4 \times 10^3$ ] |
| 9030    | $5.2 \times 10^6$<br>[ $2.4 \times 10^6$ , $8.8 \times 10^6$ ] | $3.3 \times 10^5$<br>[ $1.5 \times 10^5$ , $5.3 \times 10^5$ ] | $1.3 \times 10^5$<br>[ $6 \times 10^4$ , $2.1 \times 10^5$ ]   |
| 9075    | $3.7 \times 10^4$<br>[ $7.7 \times 10^3$ , $8.6 \times 10^4$ ] | $2.2 \times 10^3$<br>[ $4.2 \times 10^2$ , $4.7 \times 10^3$ ] | $8.9 \times 10^2$<br>[ $1.6 \times 10^2$ , $1.9 \times 10^3$ ] |
| 9012    | $4.7 \times 10^6$<br>[ $2.7 \times 10^6$ , $7.8 \times 10^6$ ] | $2.6 \times 10^5$<br>[ $1.6 \times 10^5$ , $3.9 \times 10^5$ ] | $1 \times 10^5$<br>[ $6.4 \times 10^4$ , $1.5 \times 10^5$ ]   |
| 9034    | $3.1 \times 10^6$<br>[0, $9.6 \times 10^6$ ]                   | $2.1 \times 10^5$<br>[0, $6.2 \times 10^5$ ]                   | $8.5 \times 10^4$<br>[0, $2.4 \times 10^5$ ]                   |
| 12008   | $8 \times 10^4$<br>[ $7.7 \times 10^3$ , $1.7 \times 10^5$ ]   | $5.4 \times 10^3$<br>[ $5 \times 10^2$ , $1.1 \times 10^4$ ]   | $2.2 \times 10^3$<br>[ $2 \times 10^2$ , $4.3 \times 10^3$ ]   |

**Table S2. The estimated affinity constant K for each patient given a model assuming either univalent (f=1) or multivalent binding with f=14 or f=35 maximal number of possible binding sites. Numbers in brackets represent 95% confidence intervals of the estimates.**
